# Supplementary material for: MMP12 is a Potential Predictive and Prognostic Biomarker of Various Cancers Including Lung Adenocarcinoma
Source: PubMed Central journal article supplement — Cancer Control. 2024 Feb 27;31:10732748241235468. doi: 10.1177/10732748241235468 (PMC10898301; doi:10.1177/10732748241235468), 2024-02-27
Supplement: sj-pdf-1-ccx-10.1177_10732748241235468.pdf [file sj-pdf-1-ccx-10.1177_10732748241235468.pdf]

Supplementary material 1. The dataset information for LUAD-related datasets.

| Platform             | Dataset           | Tumor sample number | Control sample number | PMID               |
|----------------------|-------------------|---------------------|-----------------------|--------------------|
| ArrayExpress_Agilent | E-MEXP-2003       | 2                   | 0                     | /                  |
|                      | E-MEXP-2004       | 2                   | 0                     | /                  |
|                      | E-MTAB-1132       | 51                  | 112                   | 24299561           |
|                      | E-MTAB-1790       | 41                  | 8                     | /                  |
|                      | E-MTAB-8727       | 1                   | 0                     | 32245792           |
| GPL10558             | GSE83213          | 11                  | 46                    | 27956437           |
|                      | GSE29249          | 3                   | 3                     | 30507050, 22046296 |
| GPL13497             | GSE148004         | 0                   | 25                    | 33076907           |
|                      | GSE74706          | 10                  | 18                    | 27197161           |
|                      | GSE140797         | 7                   | 7                     | 32792503           |
| GPL14951             | GSE62113          | 14                  | 9                     | 25429762           |
|                      | GSE46539-GPL14951 | 23                  | 23                    | 27669169, 26301798 |
| GPL17586             | GSE138326         | 0                   | 58                    | 31619441           |
|                      | GSE121397         | 3                   | 3                     | /                  |
|                      | GSE138682         | 5                   | 5                     | 32922662           |
| GPL20115             | GSE130779         | 8                   | 8                     | 32869486           |
|                      | GSE146461         | 3                   | 8                     | /                  |
| GPL21290             | GSE148036         | 5                   | 15                    | 33097805           |
|                      | GSE109528         | 1                   | 0                     | /                  |
| GPL570               | GSE118370         | 6                   | 6                     | 30545439           |
|                      | GSE130928         | 0                   | 88                    | 31751151           |
|                      | GSE33532          | 40                  | 20                    | /                  |
|                      | GSE40791          | 94                  | 100                   | 23187126           |
|                      | GSE19188          | 45                  | 65                    | 20421987           |
|                      | GSE10799          | 16                  | 3                     | 19208797           |
|                      | GSE27262          | 25                  | 25                    | 25277535           |

|                       |                  |     |     |                     |
|-----------------------|------------------|-----|-----|---------------------|
|                       | GSE27489         | 10  | 10  | 22588153            |
|                       | GSE30219         | 85  | 14  | 23698379            |
|                       | GSE31210         | 226 | 20  | 22080568, 23028479  |
| GPL6244               | GSE31552         | 38  | 43  | 25128906            |
|                       | GSE43458         | 110 | 0   | 23659968            |
|                       |                  | 0   |     |                     |
|                       | GSE80796         |     | 196 | 28376173            |
| GPL6883               | GSE63459         | 33  | 32  | 26134223            |
|                       | GSE46539-GPL6883 | 92  | 92  | 26301798, 27669169  |
| GPL6884               | GSE75037         | 83  | 83  | 27354471            |
|                       |                  |     |     | 32512502, 24618618, |
|                       | GSE32036-GPL6884 | 71  | 59  | 23091115            |
|                       | GSE32863         | 58  | 58  | 22613842            |
| GPL96                 | GSE7670          | 30  | 28  | 19337377, 17540040  |
|                       | GSE10072         | 58  | 49  | 18297132            |
|                       |                  |     |     | 18391978, 16843264, |
|                       | GSE4824-GPL96    | 32  | 3   | 27199546            |
| GPL962                | GSE1037          | 12  | 19  | 15016488, 21737174  |
|                       | GSE2088          | 8   | 11  | 21737174            |
| TCGA-GTE <sub>x</sub> | GTE <sub>x</sub> | 0   | 288 | /                   |
|                       | TCGA             | 533 | 59  | /                   |
| GPL13158              | GSE103512        | 27  | 3   | 29133367            |
| GPL6650               | GSE11117         | 13  | 15  | 19833826            |
| GPL7015               | GSE11969         | 94  | 5   | 16549822, 21465578  |
| GPL91                 | GSE1987          | 8   | 9   | 17258348            |
| GPL6254               | GSE21933         | 11  | 11  | 22691236            |
| GPL6102               | GSE32665         | 87  | 92  | 23591868            |
| GPL10153              | GSE37759         | 6   | 6   | 23405175            |
| GPL15974              | GSE40275         | 11  | 43  | 22912338            |

|          |          |     |    |                    |
|----------|----------|-----|----|--------------------|
| GPL6480  | GSE51852 | 4   | 4  | 24903339           |
| GPL10999 | GSE52248 | 12  | 6  | 24735754           |
| GPL201   | GSE6044  | 10  | 5  | 18992152           |
| GPL8432  | GSE62949 | 28  | 28 | 25650174           |
| GPL80    | GSE68571 | 86  | 10 | 12118244           |
| GPL8300  | GSE83227 | 200 | 17 | 11707567           |
| GPL19612 | GSE85716 | 6   | 6  | 29127420, 37667322 |

---
