# Supplementary material for: MMP12 is a Potential Predictive and Prognostic Biomarker of Various Cancers Including Lung Adenocarcinoma
Source: PubMed Central journal article supplement — Cancer Control. 2024 Feb 27;31:10732748241235468. doi: 10.1177/10732748241235468 (PMC10898301; doi:10.1177/10732748241235468), 2024-02-27
Supplement: sj-pdf-5-ccx-10.1177_10732748241235468.pdf [file sj-pdf-5-ccx-10.1177_10732748241235468.pdf]

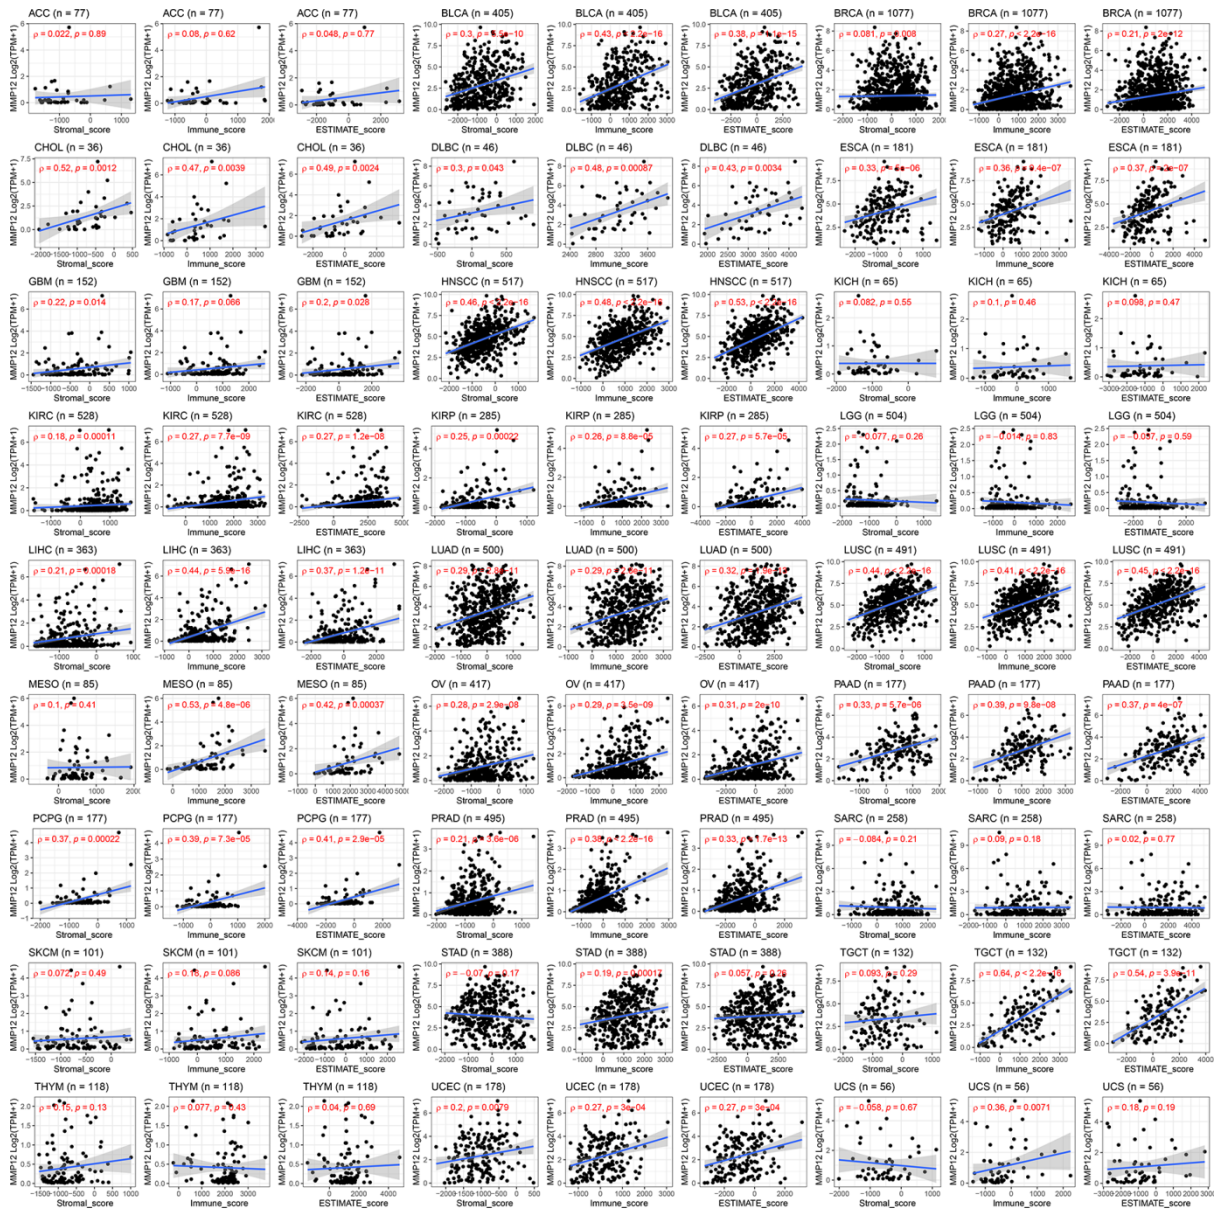

Supplementary material 5. Relationship between MMP12 expression and the ESTIMATE algorithm in multiple cancers.
