# Supplementary figures and images for: MMP12 is a Potential Predictive and Prognostic Biomarker of Various Cancers Including Lung Adenocarcinoma
Source: PubMed Central journal article supplement — Cancer Control. 2024 Feb 27;31:10732748241235468. doi: 10.1177/10732748241235468 (PMC10898301; doi:10.1177/10732748241235468), 2024-02-27

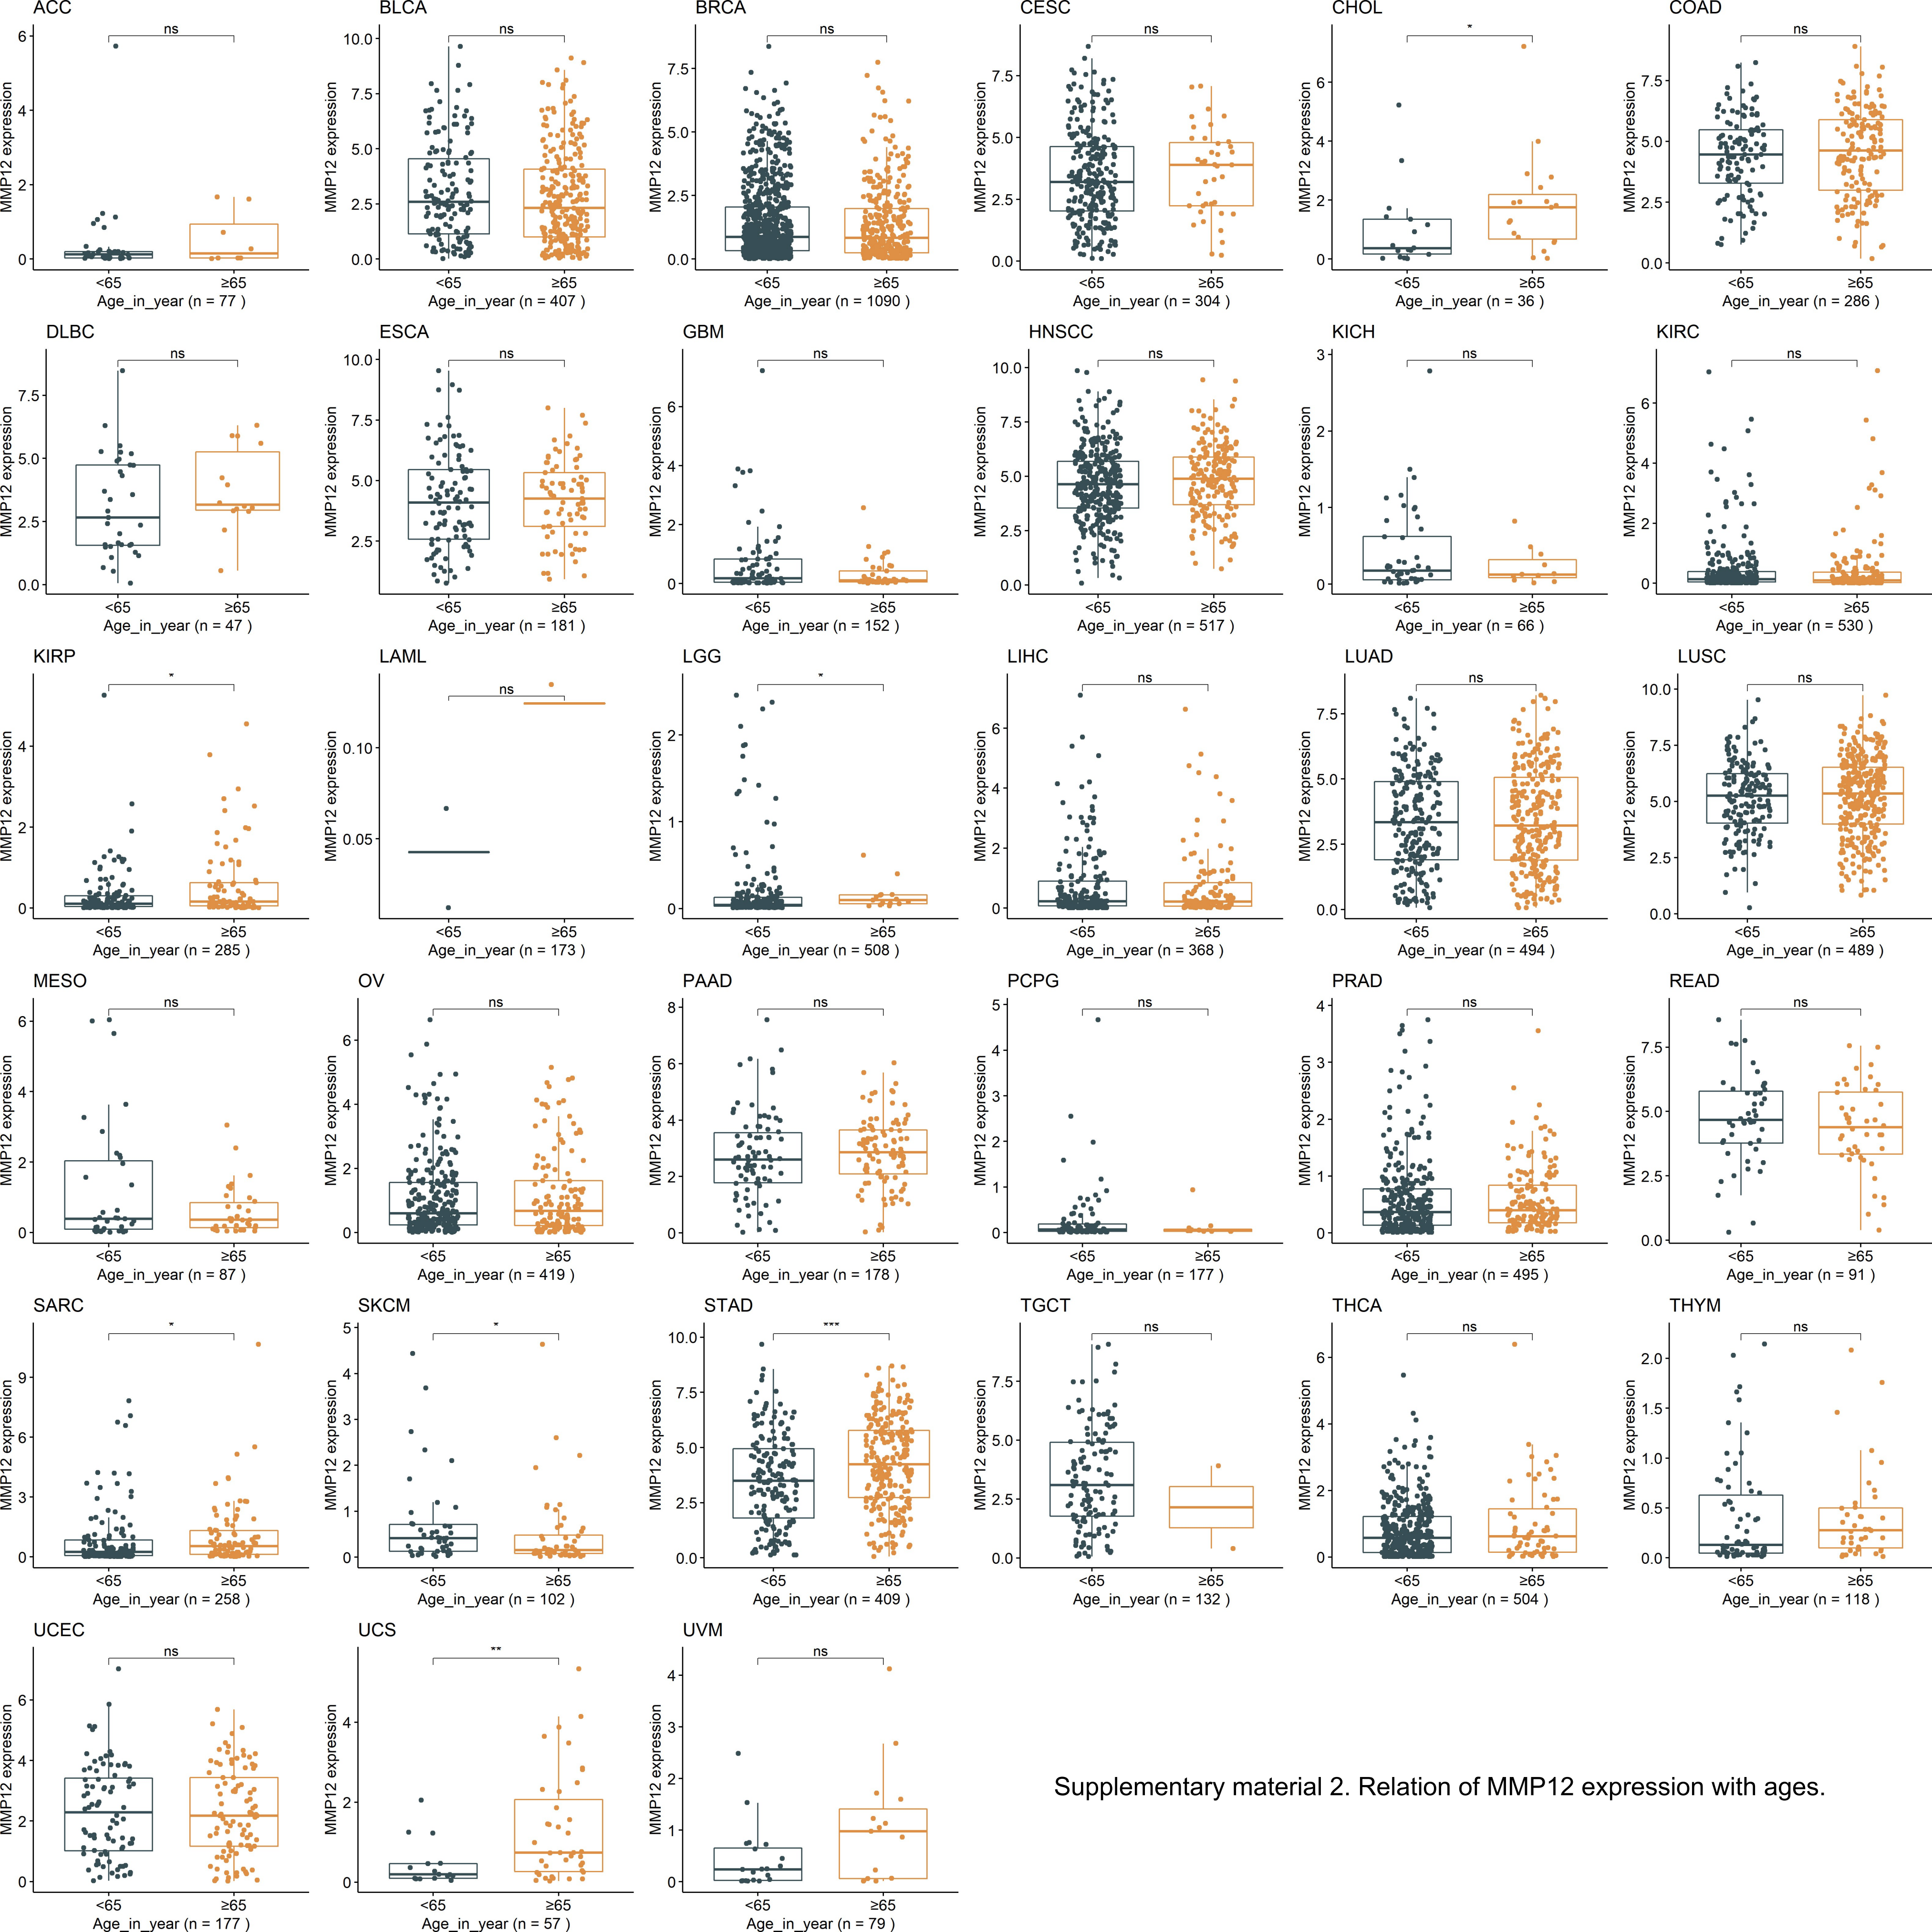

Supplementary material 2. Relation of MMP12 expression with ages.

Supplement: sj-pdf-2-ccx-10.1177_10732748241235468.pdf [file sj-pdf-2-ccx-10.1177_10732748241235468.pdf]

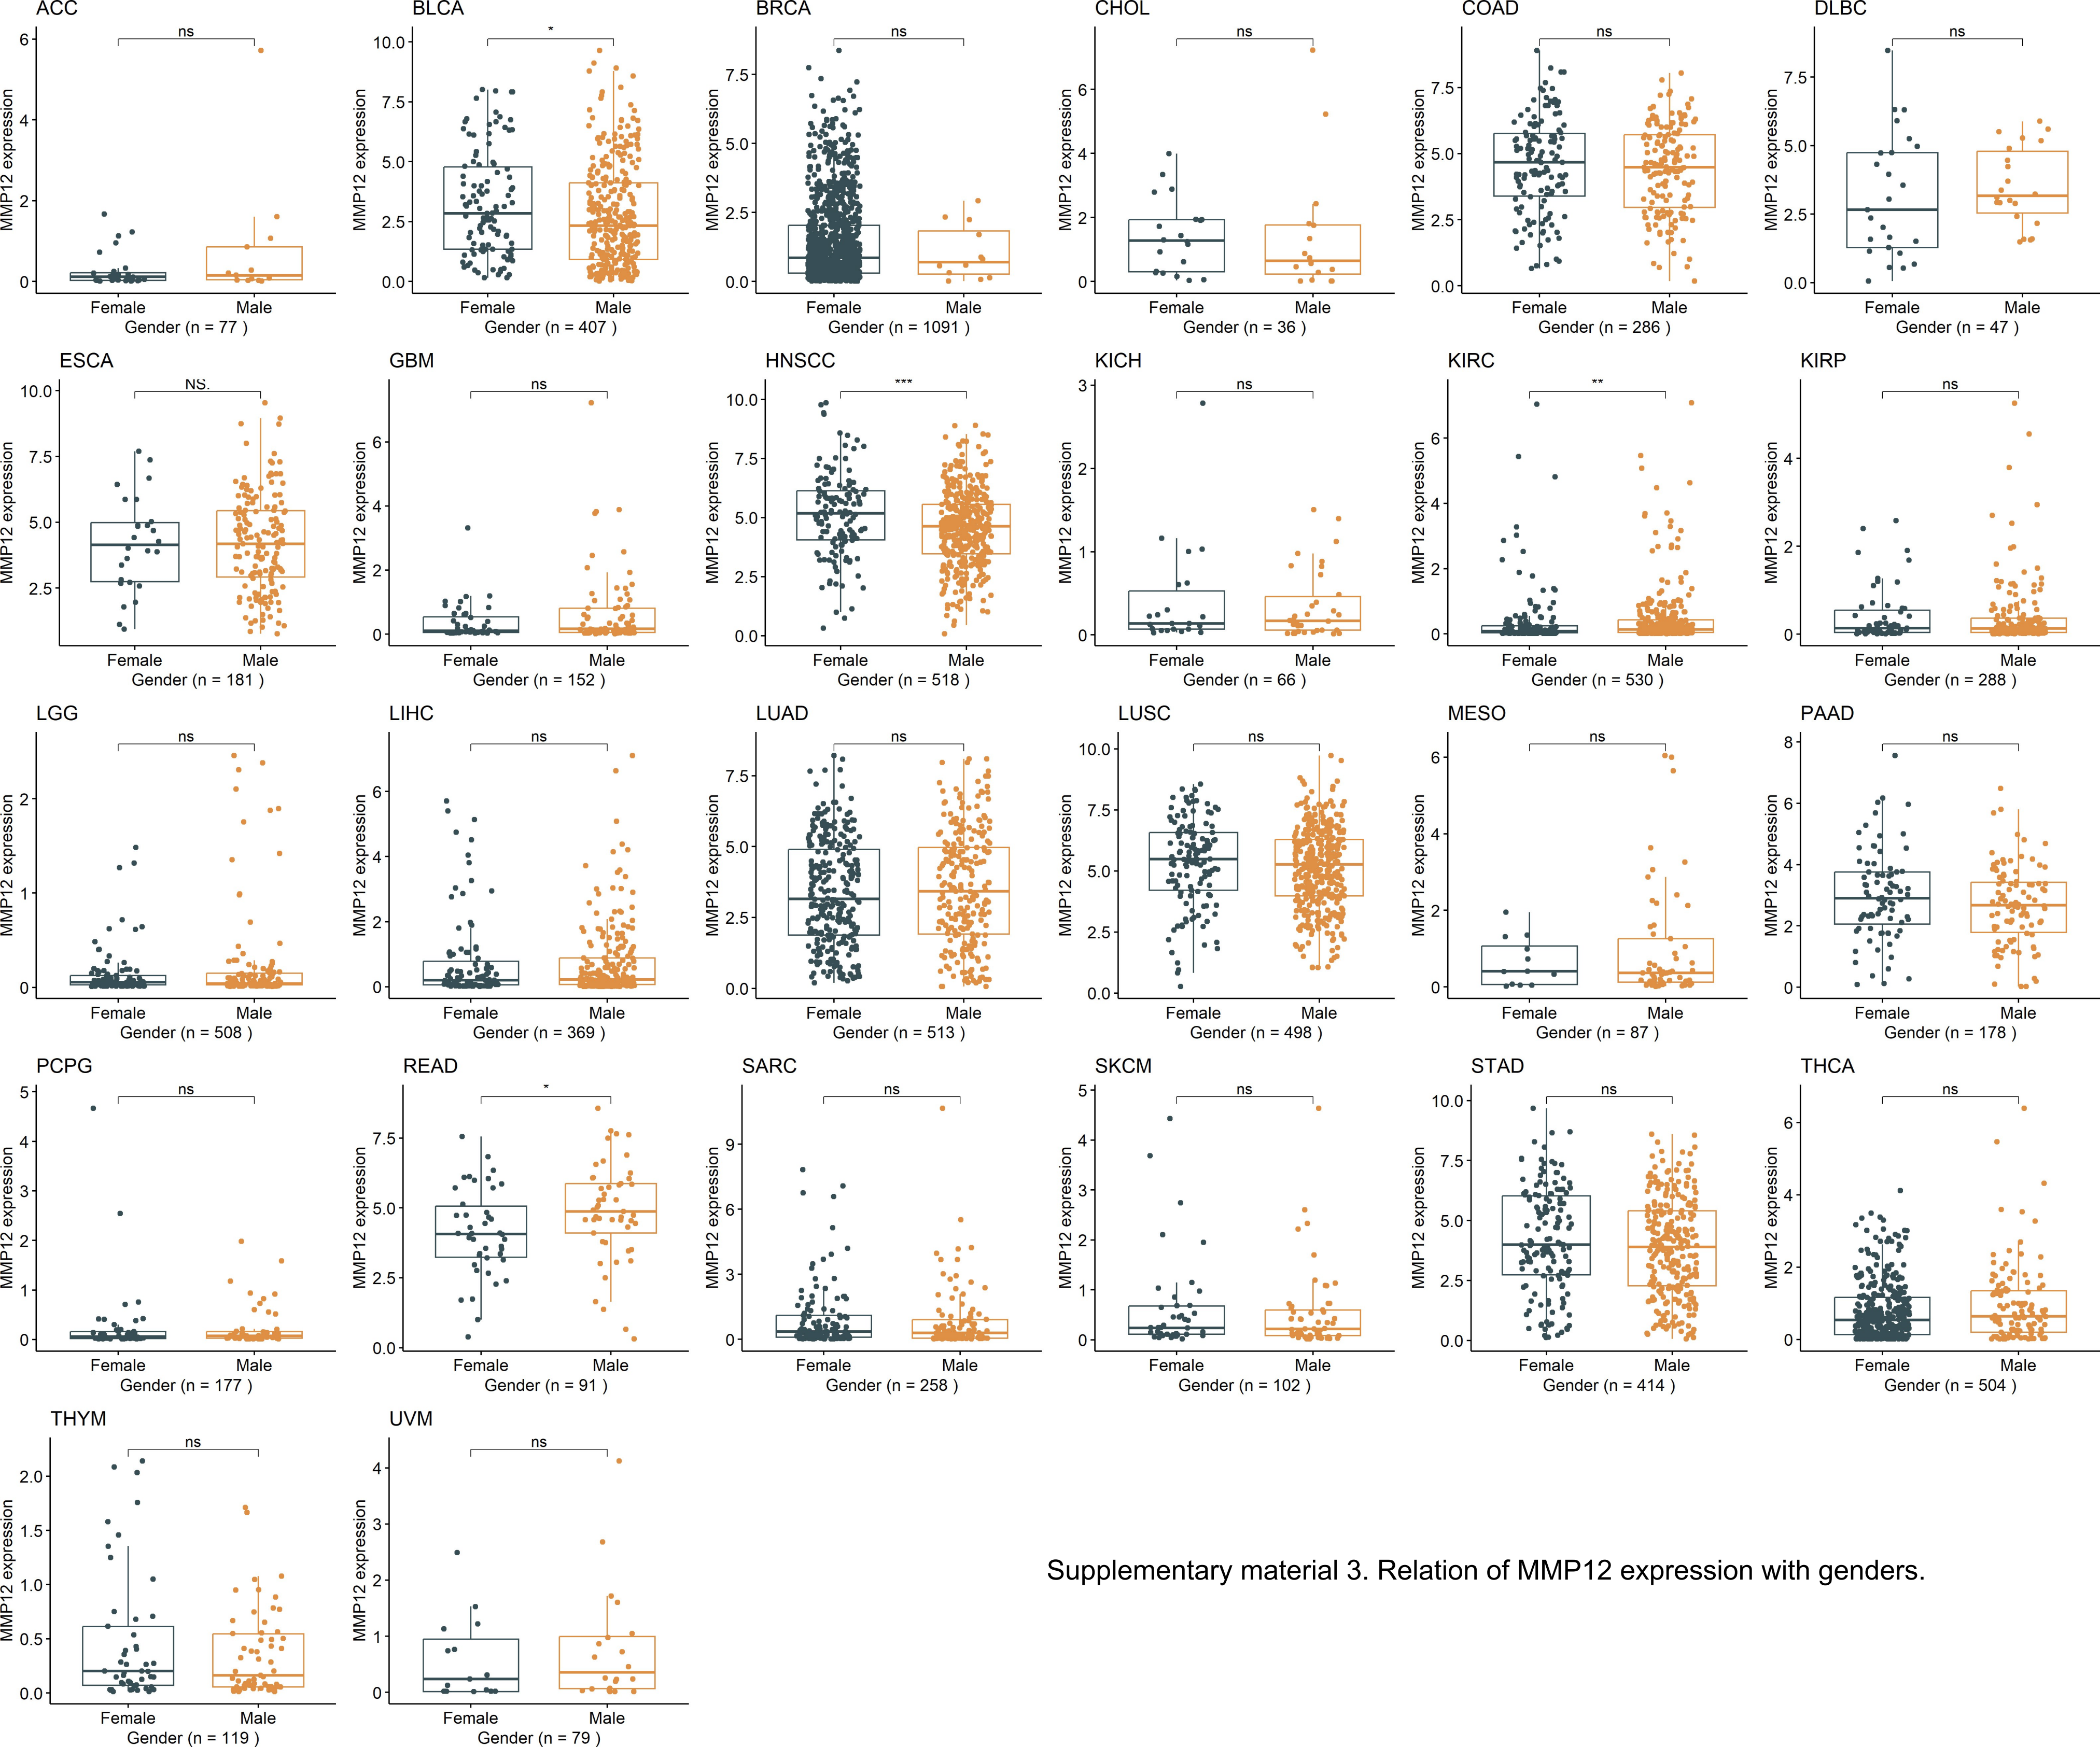

Supplementary material 3. Relation of MMP12 expression with genders.

Supplement: sj-pdf-3-ccx-10.1177_10732748241235468.pdf [file sj-pdf-3-ccx-10.1177_10732748241235468.pdf]

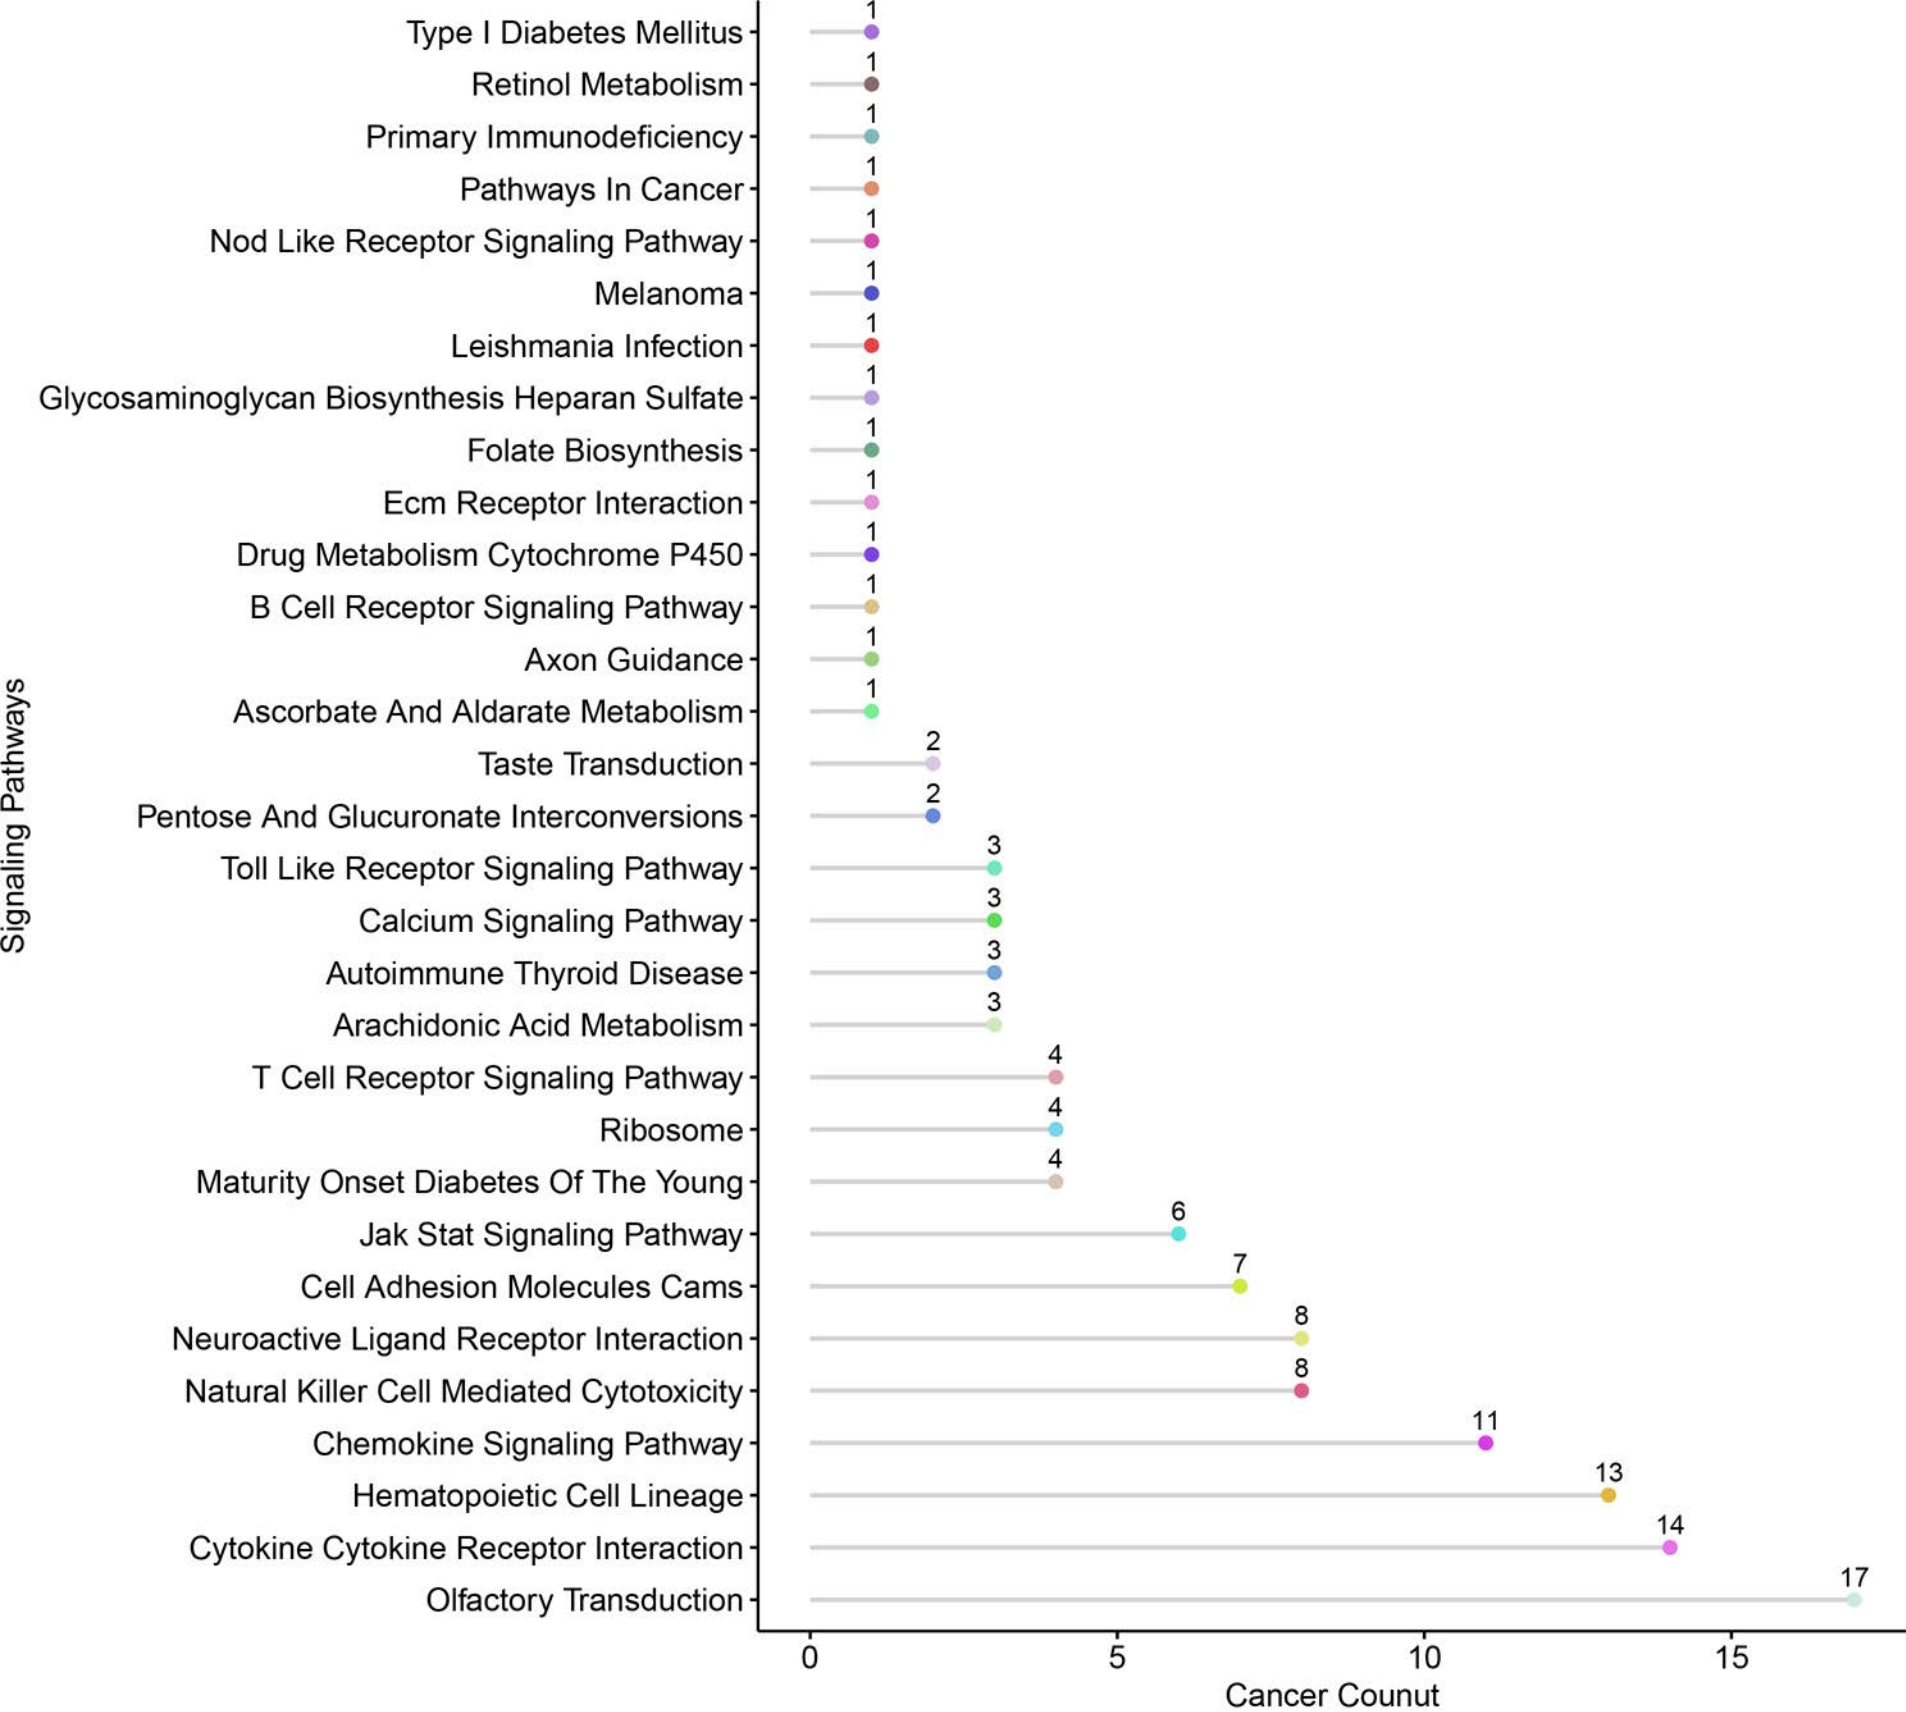

Supplementary material 6. Thirty-one most significant signaling pathways in multiple cancers.

Supplement: sj-pdf-6-ccx-10.1177_10732748241235468.pdf [file sj-pdf-6-ccx-10.1177_10732748241235468.pdf]

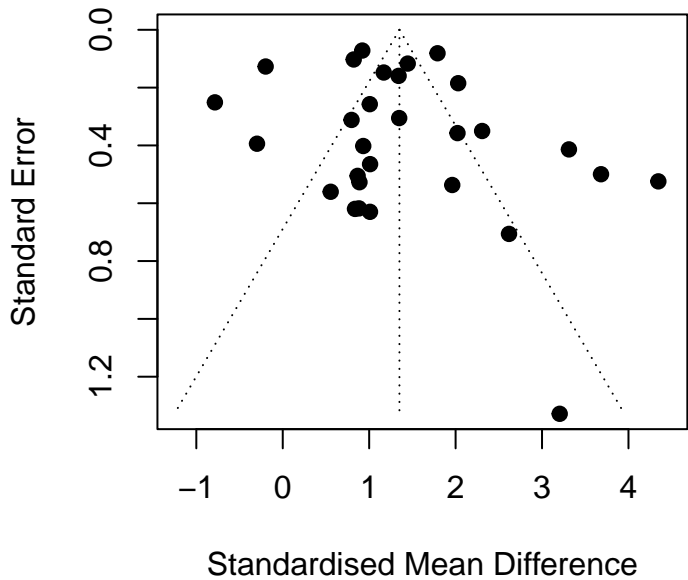

Supplement: sj-pdf-7-ccx-10.1177_10732748241235468.pdf [file sj-pdf-7-ccx-10.1177_10732748241235468.pdf]
